# Supplementary material for: Evaluation of Reference Genes and Expression Level of Genes Potentially Involved in the Mode of Action of Cry1Ac and Cry1F in a Susceptible Reference Strain of Chrysodeixis includens
Source: MDPI journal article supplement (doi:10.3390/insects12070598), 2021-06-30
Supplement: s1 [file s1]

**Table. S1** Gene names of orthologous candidate reference genes (*RPL10*, *GADPH*, *EF1*, and *ACT1*), potential orthologous Cry toxin target genes, species, GenBank accession numbers and primer sequences for the amplification of the respective *Chrysodeixis includens* genes.

| Gene name (abbreviation)                                     | Species                       | GenBank accession number | Primer sequence            | Amplification efficiency % (E) | Correlation coefficient (R <sup>2</sup> ) |
|--------------------------------------------------------------|-------------------------------|--------------------------|----------------------------|--------------------------------|-------------------------------------------|
| <i>Ribosomal Protein L10 (RPL10)</i>                         | <i>Spodoptera exigua</i>      | JF728812.1               | 5' TCTGCGTCGTGCCAAGTT 3'   | 101.41                         | 0.997                                     |
|                                                              | <i>Chrysodeixis includens</i> | MT879133                 | 5' AGGGCCGTACTTGACGTTG 3'  |                                |                                           |
| <i>Glyceraldehyde-3-phosphate dehydrogenase (GAPDH)</i>      | <i>Spodoptera litura</i>      | DQ192234.1               | 5' ACTACACCGAGGAGCAGGT 3'  | 101.98                         | 0.996                                     |
|                                                              | <i>Chrysodeixis includens</i> | MT879136                 | 5' AGCCGAACCTCGTTGTCTGT 3' |                                |                                           |
| <i>Elongation Factor 1 (EF1)</i>                             | <i>Spodoptera litura</i>      | HQ012003.2               | 5' TTGCCTGCAAATTCGCCG 3'   | 101.88                         | 0.998                                     |
|                                                              | <i>Chrysodeixis includens</i> | MT879131                 | 5' ACGCACAGAGGCTTGGAA 3'   |                                |                                           |
| $\beta$ -Actin 1 ( <i>ACT1</i> )                             | <i>Spodoptera litura</i>      | KC866373.1               | 5' TTGCCGGCAACAAGGAAC 3'   | 109.14                         | 0.996                                     |
|                                                              | <i>Chrysodeixis includens</i> | MT879129                 | 5' CGGTGGCGTCAAATGCTT 3'   |                                |                                           |
| <i>ATP-binding cassette subfamily C2 transporter (ABCC2)</i> | <i>Spodoptera frugiperda</i>  | AU038740.1               | 5' AGGACCGGTTCTTGTGGA 3'   | 95.71                          | 0.974                                     |
|                                                              | <i>Chrysodeixis includens</i> | MT879134                 | 5' AACGGGCGCTGGAAAGT 3'    |                                |                                           |
| <i>ATP-binding cassette subfamily C3 transporter (ABCC3)</i> | <i>Spodoptera frugiperda</i>  | AU038741.1               | 5' TGCCGCTTCCAACCAACT 3'   | 101.11                         | 0.994                                     |
|                                                              | <i>Chrysodeixis includens</i> | MT879135                 | 5' AGGGCTGCATCAACGGT 3'    |                                |                                           |
| <i>Membrane-bound alkaline phosphatase (mALP)</i>            | <i>Lymantria dispar</i>       | AAD31183.1               | 5' GCCGCCAAAATCGTTGCA 3'   | 109.70                         | 0.998                                     |
|                                                              | <i>Chrysodeixis includens</i> | MT879132                 | 5' TGGGCTTCTCCTGGAGT 3'    |                                |                                           |
| <i>Aminopeptidase N1 (APN1)</i>                              | <i>Plutella xylostella</i>    | AAS75551.1               | 5' TGTGCTCCTCGTTCACGT 3'   | 103.00                         | 0.997                                     |
|                                                              | <i>Chrysodeixis includens</i> | MT879125                 | 5' AGCGCCAGTGGTGAAAGT 3'   |                                |                                           |
| <i>Aminopeptidase N2 (APN2)</i>                              | <i>Lymantria dispar</i>       | AAL26894.1               | 5' TCACGCGATGTTCCCTCA 3'   | 95.00                          | 0.993                                     |
|                                                              | <i>Chrysodeixis includens</i> | MT879126                 | 5' ATGGTTCCGAAGTGGCCA 3'   |                                |                                           |
| <i>Aminopeptidase N3 (APN3)</i>                              | <i>Lymantria dispar</i>       | AAL26895.1               | 5' AACGTTGGGGCAGTGCT 3'    | 92.40                          | 0.998                                     |
|                                                              | <i>Chrysodeixis includens</i> | MT879127                 | 5' ATGTGCCACGTGGGGTT 3'    |                                |                                           |
| <i>Aminopeptidase N4 (APN4)</i>                              | <i>Plutella xylostella</i>    | AHF20243.2               | 5' ACGCACCTTGGATCGCT 3'    | 108.30                         | 0.996                                     |
|                                                              | <i>Chrysodeixis includens</i> | MT879128                 | 5' GCGGTTGACAACAGCTGT 3'   |                                |                                           |
| <i>Cadherin (CAD)</i>                                        | <i>Helicoverpa armigera</i>   | ACZ06062.1               | 5' TTTGTTACAGTGCGTGCG 3'   | 99.80                          | 0.987                                     |
|                                                              | <i>Chrysodeixis includens</i> | MT879130                 | 5' TCACGAAGTCTTCCGGCA 3'   |                                |                                           |

**Table. S2** Toxicity (LC<sub>50</sub>-and LC<sub>95</sub>-values) of Cry1Ac and Cry1F to neonates of soybean looper Benzon strain and the respective goodness of fit calculated for the non-linear regressions used

| Toxin  | N <sup>1</sup> | LC <sub>50</sub> (ng cm <sup>-2</sup> ) | 95% CI <sup>2</sup> | LC <sub>95</sub> (ng cm <sup>-2</sup> ) | 95% CI         | Slope (±SE <sup>3</sup> ) | df <sup>4</sup> | R <sup>2</sup> | SS <sup>5</sup> | Sy.x <sup>6</sup> |
|--------|----------------|-----------------------------------------|---------------------|-----------------------------------------|----------------|---------------------------|-----------------|----------------|-----------------|-------------------|
| Cry1Ac | 288            | 10.41                                   | 7.970 - 13.44       | 44.56                                   | 26.54 - 92.27  | 2.025 (0.40)              | 17              | 0.966          | 1367            | 8.967             |
| Cry1F  | 324            | 194.7                                   | 88.44 - 425.7       | 4,967                                   | 2,534 - 10,605 | 0.909 (0.10)              | 22              | 0.954          | 1545            | 8.379             |

<sup>1</sup> N: Number of individuals tested; <sup>2</sup> CI: confidence interval; <sup>3</sup> SE: standard error; <sup>4</sup> df: degree of freedom; <sup>5</sup> SS: sum of squares; <sup>6</sup> Sy.x: standard deviation of the residuals
